# Supplementary material for: Data and code availability statements in systematic reviews of interventions were often missing or inaccurate: a content analysis
Source: bioRxiv or medRxiv preprint supplement (doi:10.1101/2021.12.06.21267383), 2022-03-04
Supplement: Supplementary file [file media-1.pdf]

**Supplementary material to:**

**Data and code availability statements in systematic reviews of interventions are often missing or inaccurate: a content analysis**

Matthew J Page<sup>1</sup>, Phi-Yen Nguyen<sup>1</sup>, Daniel G Hamilton<sup>2</sup>, Neal R Haddaway<sup>3,4,5</sup>, Raju Kanukula<sup>1</sup>, David Moher<sup>6,7</sup>, Joanne E McKenzie<sup>1</sup>

1. School of Public Health and Preventive Medicine, Monash University, Melbourne, Australia
2. School of BioSciences, University of Melbourne, Melbourne, Australia
3. Leibniz-Centre for Agricultural Landscape Research (ZALF), Eberswalder Str. 84, Müncheberg, Germany
4. Stockholm Environment Institute, Linnégatan 87D, Stockholm, Sweden
5. African Centre for Evidence, University of Johannesburg, Johannesburg, South Africa
6. Centre for Journalology, Clinical Epidemiology Program, Ottawa Hospital Research Institute, Ottawa, Canada
7. School of Epidemiology and Public Health, Faculty of Medicine, University of Ottawa, Ottawa, Canada

**Correspondence to:** Dr. Matthew Page, School of Public Health and Preventive Medicine, Monash University, 553 St Kilda Road, Melbourne, Victoria, 3004, Australia. Telephone: +61 9903 0248. Email address: [matthew.page@monash.edu](mailto:matthew.page@monash.edu)

## **Appendix 1: Search strategies**

Searches run on Thursday 3 December 2020

### **PubMed**

(meta-analysis[PT] OR meta-analysis[TI] OR systematic[sb]) AND 2020/11/02:2020/12/02[EDAT]

### **Science Citation Index Expanded (SCI-EXPANDED) and Social Sciences Citation Index (SSCI) via Web of Science**

(TI=meta-analysis OR AB=meta-analysis OR TS=meta-analysis OR TI="systematic review" OR AB="systematic review" OR TS="systematic review") AND **LANGUAGE:** (English) AND **DOCUMENT TYPES:** (Article OR Review)

*Indexes=SCI-EXPANDED, SSCI; Timespan=Last 4 weeks*

### **Scopus via Elsevier**

TITLE("meta-analysis" OR "systematic review") AND ORIG-LOAD-DATE > 1604275200 AND ORIG-LOAD-DATE < 1606867200 AND (LIMIT-TO(DOCTYPE, "ar") OR LIMIT-TO(DOCTYPE, "re"))

### **Education Collection via ProQuest (added in 30 last days)**

MAINSUBJECT.EXACT.EXPLODE("Meta Analysis") OR ab(meta-analysis OR systematic review) OR ti(meta-analysis OR systematic review)

## Appendix 2. Data collection form

| Item                                                                          | Response option                                                                                                                                                                                                                                                                                                                                                                                                                                                                                                                                                                                                                                                                                                                                                                                                                                                                                                                                                                                                                                                                                                                                                                                                                              |
|-------------------------------------------------------------------------------|----------------------------------------------------------------------------------------------------------------------------------------------------------------------------------------------------------------------------------------------------------------------------------------------------------------------------------------------------------------------------------------------------------------------------------------------------------------------------------------------------------------------------------------------------------------------------------------------------------------------------------------------------------------------------------------------------------------------------------------------------------------------------------------------------------------------------------------------------------------------------------------------------------------------------------------------------------------------------------------------------------------------------------------------------------------------------------------------------------------------------------------------------------------------------------------------------------------------------------------------|
| Specify the title of the systematic review:                                   | Free text                                                                                                                                                                                                                                                                                                                                                                                                                                                                                                                                                                                                                                                                                                                                                                                                                                                                                                                                                                                                                                                                                                                                                                                                                                    |
| Specify the journal:                                                          | Free text                                                                                                                                                                                                                                                                                                                                                                                                                                                                                                                                                                                                                                                                                                                                                                                                                                                                                                                                                                                                                                                                                                                                                                                                                                    |
| Specify the country of the corresponding author of the systematic review:     | Free text                                                                                                                                                                                                                                                                                                                                                                                                                                                                                                                                                                                                                                                                                                                                                                                                                                                                                                                                                                                                                                                                                                                                                                                                                                    |
| What was the source of funding for the systematic review?                     | <ul style="list-style-type: none"> <li><input type="radio"/> Non-profit (e.g. government, university/hospital/research institute, charitable foundation)</li> <li><input type="radio"/> For-profit (e.g. pharmaceutical company)</li> <li><input type="radio"/> Both non-profit and for-profit</li> <li><input type="radio"/> Unclear if the funder is for-profit or non-profit (please specify funder):<br/>_____</li> <li><input type="radio"/> Authors specified there was no funding for the systematic review</li> <li><input type="radio"/> Not reported</li> </ul>                                                                                                                                                                                                                                                                                                                                                                                                                                                                                                                                                                                                                                                                    |
| Did any of the systematic reviewers disclose financial conflicts of interest? | <ul style="list-style-type: none"> <li><input type="radio"/> Conflict of interest present (i.e. at least one systematic reviewer reported a financial conflict of interest of any type)</li> <li><input type="radio"/> No conflict of interest (i.e. all systematic reviewers stated they had no financial conflicts of interest)</li> <li><input type="radio"/> Missing (i.e. no disclosure statement)</li> </ul>                                                                                                                                                                                                                                                                                                                                                                                                                                                                                                                                                                                                                                                                                                                                                                                                                           |
| Specify the total number of studies included in the systematic review:        | Numeric                                                                                                                                                                                                                                                                                                                                                                                                                                                                                                                                                                                                                                                                                                                                                                                                                                                                                                                                                                                                                                                                                                                                                                                                                                      |
| What is the broad ICD-11 category investigated in this systematic review?     | <ul style="list-style-type: none"> <li><input type="radio"/> Not applicable</li> <li><input type="radio"/> 01 Certain infectious or parasitic diseases</li> <li><input type="radio"/> 02 Neoplasms</li> <li><input type="radio"/> 03 Diseases of the blood or blood-forming organs</li> <li><input type="radio"/> 04 Diseases of the immune system</li> <li><input type="radio"/> 05 Endocrine, nutritional or metabolic diseases</li> <li><input type="radio"/> 06 Mental, behavioural or neurodevelopmental disorders</li> <li><input type="radio"/> 07 Sleep-wake disorders</li> <li><input type="radio"/> 08 Diseases of the nervous system</li> <li><input type="radio"/> 09 Diseases of the visual system</li> <li><input type="radio"/> 10 Diseases of the ear or mastoid process</li> <li><input type="radio"/> 11 Diseases of the circulatory system</li> <li><input type="radio"/> 12 Diseases of the respiratory system</li> <li><input type="radio"/> 13 Diseases of the digestive system</li> <li><input type="radio"/> 14 Diseases of the skin</li> <li><input type="radio"/> 15 Diseases of the musculoskeletal system or connective tissue</li> <li><input type="radio"/> 16 Diseases of the genitourinary system</li> </ul> |

| Item                                                                                                                                                                                                                                 | Response option                                                                                                                                                                                                                                                                                                                                                                                                                                                                                                                                                                                                                                                                                                                                                                                                                                                                                                                                                                                                                                                                                                                 |
|--------------------------------------------------------------------------------------------------------------------------------------------------------------------------------------------------------------------------------------|---------------------------------------------------------------------------------------------------------------------------------------------------------------------------------------------------------------------------------------------------------------------------------------------------------------------------------------------------------------------------------------------------------------------------------------------------------------------------------------------------------------------------------------------------------------------------------------------------------------------------------------------------------------------------------------------------------------------------------------------------------------------------------------------------------------------------------------------------------------------------------------------------------------------------------------------------------------------------------------------------------------------------------------------------------------------------------------------------------------------------------|
|                                                                                                                                                                                                                                      | <ul style="list-style-type: none"> <li>○ 17 Conditions related to sexual health</li> <li>○ 18 Pregnancy, childbirth or the puerperium</li> <li>○ 19 Certain conditions originating in the perinatal period</li> <li>○ 20 Developmental anomalies</li> <li>○ 21 Symptoms, signs or clinical findings, not elsewhere classified</li> <li>○ 22 Injury, poisoning or certain other consequences of external causes</li> <li>○ 23 External causes of morbidity or mortality</li> <li>○ 24 Factors influencing health status or contact with health services</li> </ul>                                                                                                                                                                                                                                                                                                                                                                                                                                                                                                                                                               |
| Specify the type of intervention(s) indicated in the review objective(s) or question(s) (e.g. inhaled corticosteroids, provision of charity or welfare, use of bystander programs, reduction in class size) [Select all that apply]: | <ul style="list-style-type: none"> <li>○ Health (i.e. any intervention designed to improve “health” defined as a state of complete physical, mental and social well-being and not merely the absence of disease or infirmity)</li> <li>○ Behavioural (i.e. any intervention designed to increase useful behaviours and reduce or eliminate harmful behaviours, such as modelling, prompting, reinforcement, or shaping behaviours)</li> <li>○ Educational (i.e. any intervention designed to provide students with the support needed to acquire the skills being taught by an educational system)</li> <li>○ Social (i.e. any intervention of a government or an organization in social affairs, such as provision of charity or social welfare as a means to alleviate social and economic problems of people facing financial difficulties; provision of safety regulations for employment and products; delivery of food aid, food bank or recovery missions to regions or countries negatively affected by an event; securing workers’ rights through gradualism in institutions, private education and unions)</li> </ul> |
| Is/are the intervention intervention(s) indicated in the review objective(s) or question(s) pharmacological or non-pharmacological?                                                                                                  | <ul style="list-style-type: none"> <li>○ Pharmacological</li> <li>○ Non-pharmacological (i.e. any intervention that does not involve drugs, e.g. device, vitamin, diet, psychotherapy, physical therapy, welfare, organization change, education)</li> <li>○ Both pharmacological and non-pharmacological</li> </ul>                                                                                                                                                                                                                                                                                                                                                                                                                                                                                                                                                                                                                                                                                                                                                                                                            |
| Is a protocol or registration record for the systematic review cited within the review?                                                                                                                                              | <ul style="list-style-type: none"> <li>○ Both a protocol and registration record are cited</li> <li>○ Only a protocol is cited</li> </ul>                                                                                                                                                                                                                                                                                                                                                                                                                                                                                                                                                                                                                                                                                                                                                                                                                                                                                                                                                                                       |

| Item                                                                                                                                                                                                                                                                                                                                                                                           | Response option                                                                                                                                                                                                                                                                                                                                                                                                                                                                                                                                                                                                                                                                                                                                                                                                                                                                                                                                                                                                              |
|------------------------------------------------------------------------------------------------------------------------------------------------------------------------------------------------------------------------------------------------------------------------------------------------------------------------------------------------------------------------------------------------|------------------------------------------------------------------------------------------------------------------------------------------------------------------------------------------------------------------------------------------------------------------------------------------------------------------------------------------------------------------------------------------------------------------------------------------------------------------------------------------------------------------------------------------------------------------------------------------------------------------------------------------------------------------------------------------------------------------------------------------------------------------------------------------------------------------------------------------------------------------------------------------------------------------------------------------------------------------------------------------------------------------------------|
|                                                                                                                                                                                                                                                                                                                                                                                                | <ul style="list-style-type: none"> <li><input type="radio"/> Only a registration record is cited</li> <li><input type="radio"/> Neither are cited</li> </ul>                                                                                                                                                                                                                                                                                                                                                                                                                                                                                                                                                                                                                                                                                                                                                                                                                                                                 |
| Which statistical software was used to perform meta-analyses [Select all that apply]?                                                                                                                                                                                                                                                                                                          | <ul style="list-style-type: none"> <li><input type="radio"/> R</li> <li><input type="radio"/> Stata</li> <li><input type="radio"/> RevMan</li> <li><input type="radio"/> Comprehensive Meta-Analysis (CMA)</li> <li><input type="radio"/> SAS</li> <li><input type="radio"/> SPSS</li> <li><input type="radio"/> Other (please specify)</li> <li><input type="radio"/> Not reported</li> </ul>                                                                                                                                                                                                                                                                                                                                                                                                                                                                                                                                                                                                                               |
| Is there a data or code availability statement in the paper?                                                                                                                                                                                                                                                                                                                                   | <ul style="list-style-type: none"> <li><input type="radio"/> Yes</li> <li><input type="radio"/> No</li> </ul>                                                                                                                                                                                                                                                                                                                                                                                                                                                                                                                                                                                                                                                                                                                                                                                                                                                                                                                |
| If yes to the previous question, copy and paste the data and code statement(s) verbatim:                                                                                                                                                                                                                                                                                                       | Free text                                                                                                                                                                                                                                                                                                                                                                                                                                                                                                                                                                                                                                                                                                                                                                                                                                                                                                                                                                                                                    |
| Have the authors made any of the following publicly accessible, either as a supplementary file or file uploaded to a general-purpose repository (e.g. Open Science Framework, Zenodo, GitHub) or institutional repository? [Select all that apply. Only select each if you are able to locate the relevant material, after searching all supplementary materials or links to shared materials] | <ul style="list-style-type: none"> <li><input type="radio"/> Template data collection form(s)</li> <li><input type="radio"/> File(s) containing (unprocessed) data extracted from included studies</li> <li><input type="radio"/> File(s) indicating any necessary data conversions performed</li> <li><input type="radio"/> File(s) containing data used in all analyses (e.g. Microsoft Excel or CSV spreadsheet, or RevMan file containing all study effect estimates included in meta-analyses)</li> <li><input type="radio"/> Analytic code used to generate results (i.e. the sequence of commands used within a software package to manage and analyse data)</li> <li><input type="radio"/> File(s) containing citations of all records that were screened and excluded</li> <li><input type="radio"/> Metadata which describes the contents of the shared file(s) to aid interpretation and reuse (e.g. a file with complete descriptions of variable names, or README files describing each file shared)</li> </ul> |
| If yes to any of the materials selected, how was the material shared publicly? [Select all that apply]                                                                                                                                                                                                                                                                                         | <ul style="list-style-type: none"> <li><input type="radio"/> Uploaded as a supplementary file on the journal website</li> <li><input type="radio"/> Uploaded to a general-purpose open-access repository (e.g. Open Science Framework, Zenodo, GitHub) (please specify)</li> <li><input type="radio"/> Uploaded to an institutional repository</li> <li><input type="radio"/> Uploaded to a personal website</li> <li><input type="radio"/> Other (please specify)</li> </ul>                                                                                                                                                                                                                                                                                                                                                                                                                                                                                                                                                |
| If yes to any of the materials selected, are any of the data file(s) associated with a persistent identifier (e.g. DOI)?                                                                                                                                                                                                                                                                       | <ul style="list-style-type: none"> <li><input type="radio"/> Yes</li> <li><input type="radio"/> No</li> <li><input type="radio"/> Unsure</li> </ul>                                                                                                                                                                                                                                                                                                                                                                                                                                                                                                                                                                                                                                                                                                                                                                                                                                                                          |

| <b>Item</b>                                                                                                       | <b>Response option</b>                                                                |
|-------------------------------------------------------------------------------------------------------------------|---------------------------------------------------------------------------------------|
| If yes to any of the materials selected, was a license applied to any of the data file(s) (e.g. CC BY, CC BY-NC)? | <input type="radio"/> Yes<br><input type="radio"/> No<br><input type="radio"/> Unsure |
